# Supplementary material for: Self-Assembly Behavior, Aggregation Structure, and the Charge Carrier Transport Properties of S-Heterocyclic Annulated Perylene Diimide Derivatives
Source: MDPI journal article supplement (doi:10.3390/molecules29091964), 2024-04-25
Supplement: s1 [file s1]

# Supplement Files

## Self-Assembly Behavior, Aggregation Structure, and the Charge Carrier Transport Properties of S-Heterocyclic Annulated Perylene Diimide Derivatives

Haijie Ben <sup>1</sup>, Gaojie Yan <sup>2</sup>, Yulin Wang <sup>1</sup>, Huiming Zeng <sup>1</sup>, Yuechao Wu <sup>1</sup>, Feng Lin <sup>1</sup>,  
Junhua Zhao <sup>1</sup>, Wanglong Du <sup>3</sup>, Shaojie Zhang <sup>1</sup>, Shijia Zhou <sup>1</sup>, Jingyu Pu <sup>1</sup>, Milan Ye <sup>1</sup>,  
Haifeng Ji <sup>2,\*</sup> and Liang Lv <sup>1,\*</sup>

- <sup>1</sup> College of Chemical and Material Engineering, Quzhou University,  
Quzhou 324000, China; benhaijie@tju.edu.cn (H.B.); csu\_lin@163.com (Y.W.);  
weimingzeng@tom.com (H.Z.); wuyuechao\_qzu@163.com (Y.W.);  
linf2015@126.com (F.L.); qzzjh@qzc.edu.cn (J.Z.);  
zhangshaojie031026@163.com (S.Z.); yemilan@qzc.edu.cn (M.Y.)
- <sup>2</sup> Shenzhen Research Institute of Nankai University, Nankai University,  
Shenzhen 518083, China; 202021501025@stu.hebut.edu.cn
- <sup>3</sup> College of Chemical Engineering, Zhejiang University of Technology,  
Hangzhou 310014, China
- \* Correspondence: haifengji@nankai.edu.cn (H.J.); lianglv@qzc.edu.cn (L.L.)

**1. DFT-optimized molecular conformations and the calculated intermolecular distance of linear SPDI and dendronized SPDI**

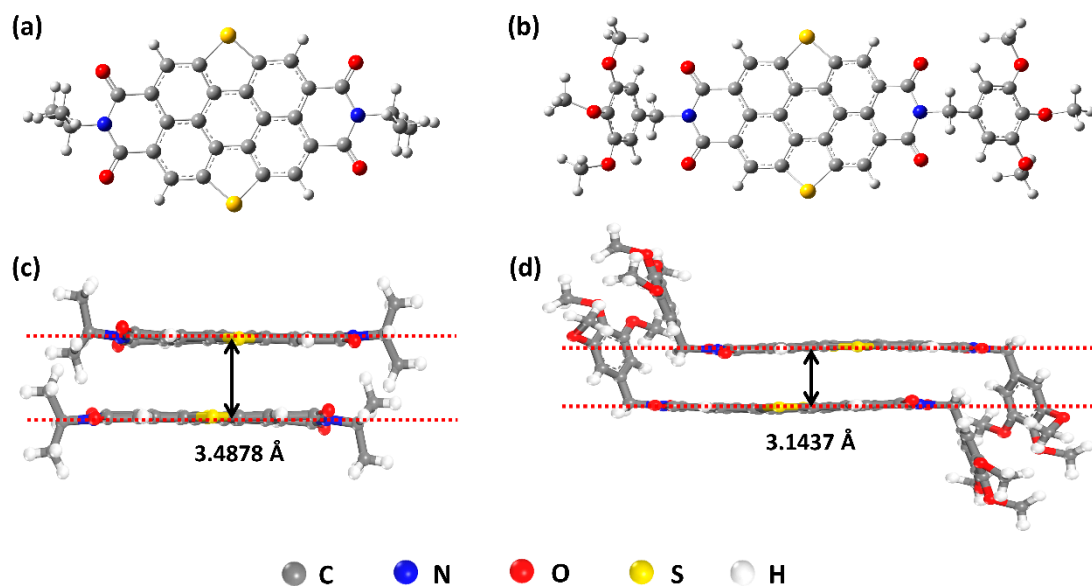

**Figure S1.** DFT-optimized molecular conformations of (a) linear SPDI and (b) dendronized SPDI, and the calculated intermolecular distance of (c) linear SPDI (3.4878 Å) and (d) dendronized SPDI (3.1437 Å).

## 2. The crystallographic parameters of linear SPDI

**Table S1.** Crystallographic parameters of linear SPDI

| <i>(hkl)</i> | 2 $\theta$ (deg)  |                    | <i>d</i> -spacing (nm) |                    | Intensity         |
|--------------|-------------------|--------------------|------------------------|--------------------|-------------------|
|              | expt <sup>a</sup> | calcd <sup>b</sup> | expt <sup>a</sup>      | calcd <sup>b</sup> | expt <sup>c</sup> |
| 100          | 2.80              | 2.80               | 3.16                   | 3.16               | w                 |
| 010          | 3.00              | 3.00               | 2.95                   | 2.95               | vs                |
| -110         | 3.75              | 3.75               | 2.36                   | 2.36               | vw                |
| 020          | 6.00              | 6.00               | 1.47                   | 1.47               | s                 |
| -220         | 7.50              | 7.50               | 1.18                   | 1.18               | vw                |
| 030          | 9.00              | 9.01               | 0.98                   | 0.98               | s                 |
| -330         | 11.00             | 11.27              | 0.80                   | 0.79               | vw                |
| 060          | 18.00             | 18.07              | 0.49                   | 0.49               | w                 |
| 540          | 20.00             | 19.99              | 0.44                   | 0.44               | m                 |
| 630          | 20.70             | 20.43              | 0.43                   | 0.43               | w                 |
| 640          | 22.00             | 22.34              | 0.40                   | 0.40               | w                 |
| 650          | 23.60             | 24.48              | 0.38                   | 0.36               | m                 |
| 660          | 26.00             | 26.81              | 0.34                   | 0.33               | m                 |
| 011          | 8.60              | 8.92               | 1.03                   | 0.99               | m                 |
| 021          | 9.90              | 10.33              | 0.89                   | 0.86               | m                 |
| -321         | 12.70             | 12.69              | 0.70                   | 0.70               | m                 |
| -331         | 14.00             | 14.07              | 0.63                   | 0.63               | m                 |
| 331          | 15.80             | 15.76              | 0.56                   | 0.56               | w                 |
| -341         | 16.50             | 15.91              | 0.54                   | 0.56               | w                 |
| 541          | 21.00             | 21.71              | 0.42                   | 0.41               | w                 |
| 022          | 17.00             | 17.90              | 0.52                   | 0.50               | w                 |
| 032          | 18.80             | 19.13              | 0.47                   | 0.46               | vs                |
| 033          | 25.60             | 26.98              | 0.35                   | 0.33               | w                 |

### 3. The direct image of self-assembly of linear SPDI

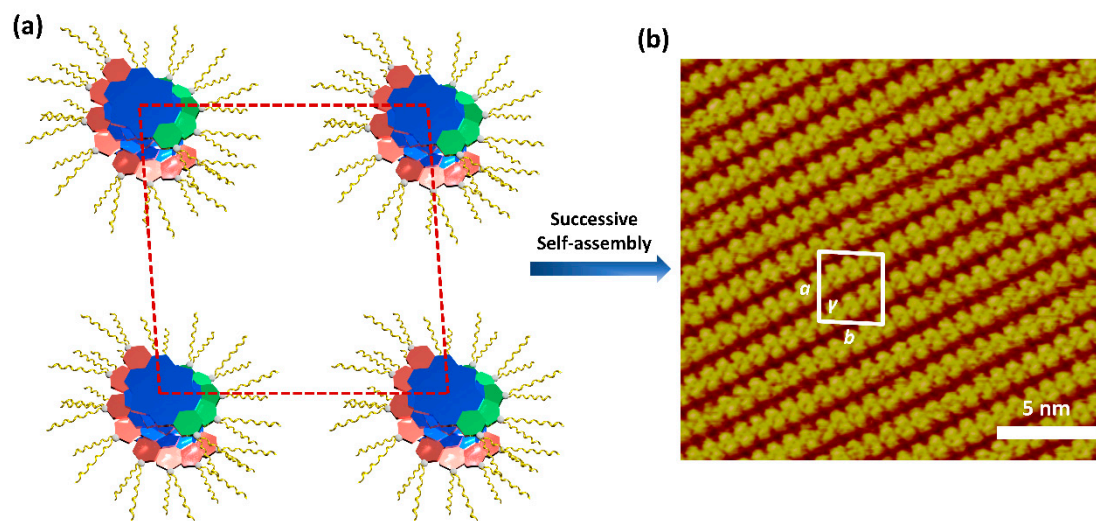

**Figure S2.** (a) Model of the helical column in the monoclinic lattice of linear SPDI; (b) high-resolution STM image of linear SPDI.

### 4. The $^1\text{H}$ NMR spectrum of compound 2 recorded in $\text{CDCl}_3$

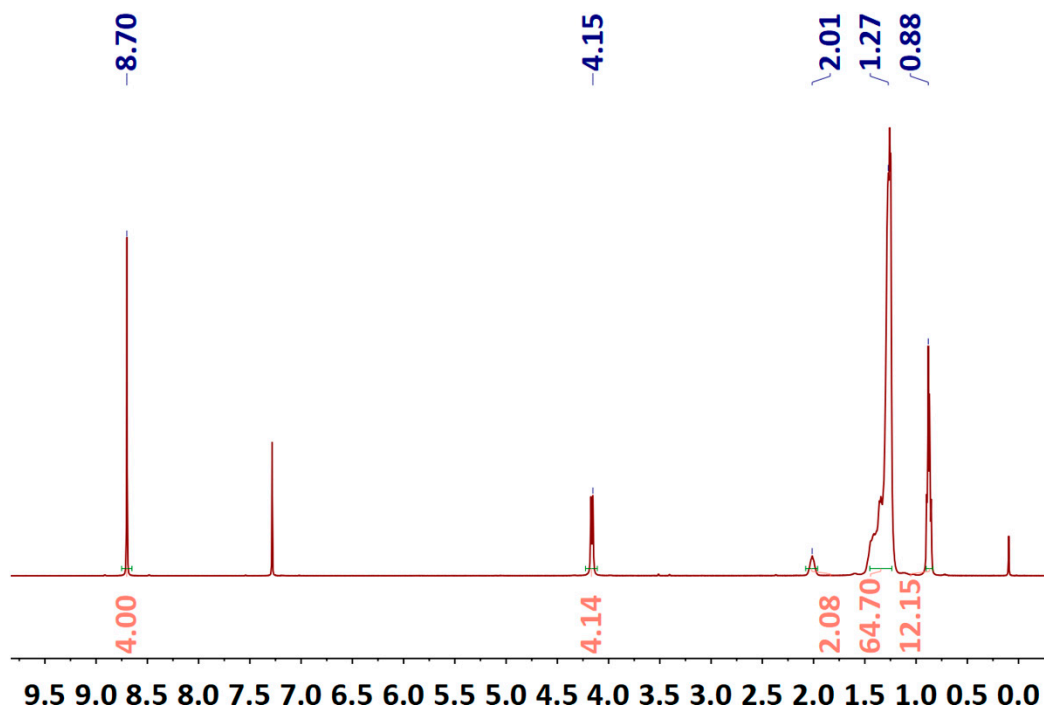

**Figure S3.**  $^1\text{H}$  NMR spectrum of compound 2.

5. The  $^1\text{H}$  NMR spectrum of linear SPDI recorded in  $\text{CDCl}_3$ .

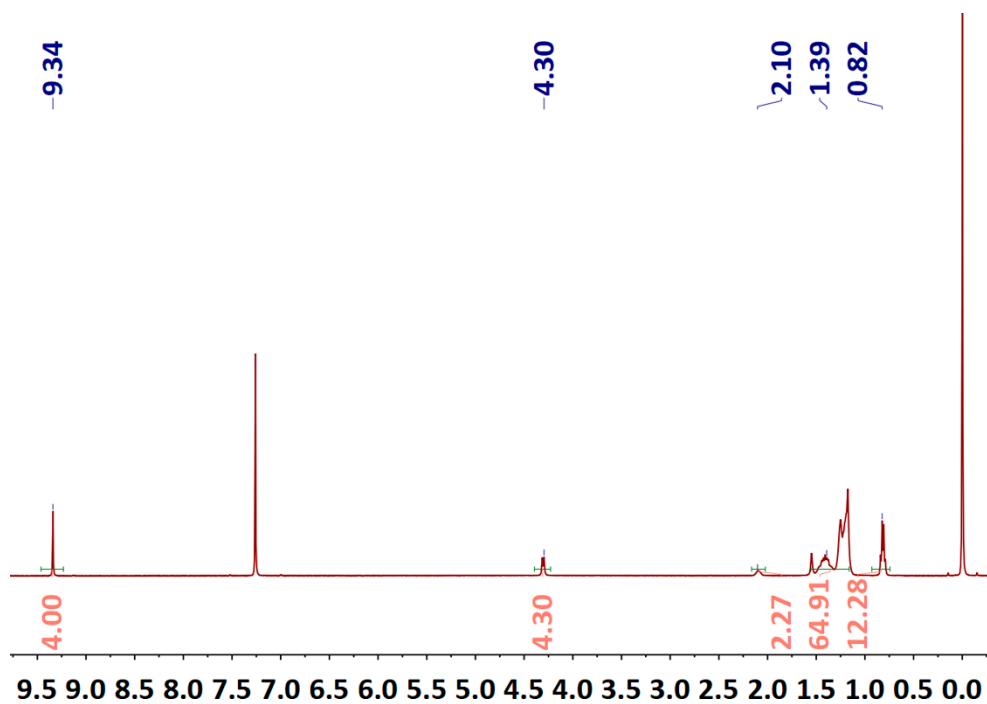

Figure S4.  $^1\text{H}$  NMR spectrum of linear SPDI.

6. The  $^1\text{H}$  NMR spectrum of dendronized SPDI recorded in  $\text{CDCl}_3$ .

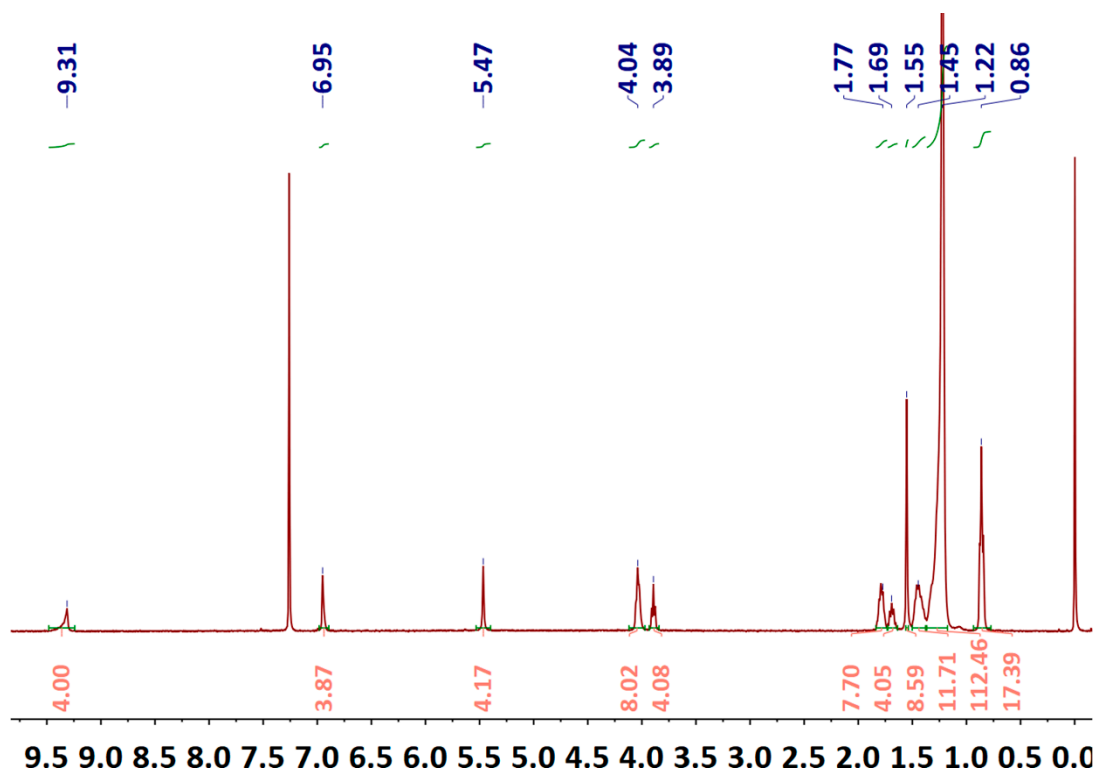

Figure S5.  $^1\text{H}$  NMR spectrum of dendronized SPDI.
